# Subject Index

## **aberrant immune response 8**

tumor suppressor genes: BRYANT, WATSON, JUSTICE AND WOODS 93, 239.

## **achaete**

shaggy repression of *achaete-scute*: SIMPSON, RUEL, HEITZLER AND BOUROUIS 93, 29.

## **Adhesion**

keratinocyte integrins: WATT AND JONES 93, 185.

## **cAMP**

signalling pathways in *Dictyostelium*: WILLIAMS, HOPPER, EARLY, TRAYNOR, HARWOOD, ABE, SIMON AND VERON 93, 1.

## **Arabidopsis**

cellular interactions in *Arabidopsis*: PRUITT, HULSKAMP, KOPCZAK, PLOENSE AND SCHNEITZ 93, 77.

## **armadillo**

cell adhesion and signal transduction in *Drosophila*: PEIFER, ORSULIC, PAI AND LOUREIRO 93, 163.

*engrailed* and *wingless* in segment polarity mutants: VAN DEN HEUVEL, KLINGENSMITH, PERRIMON AND NUSSE 93, 105.

## **Axon guidance**

life history of the RP3 motor neuron: BROADIE, SINK, VAN VACTOR, FAMBROUGH, WHITTINGTON, BATE AND GOODMAN 93, 227.

## **Binding sites**

interactions amongst cell adhesion molecules: SIMMONS 93, 193.

## **Blastoderm**

migration of *Drosophila* germ cells: HOWARD, JAGLARZ, ZHANG, SHAH AND WARRIOR 93, 213.

## **Blastomere**

*C. elegans* blastomere polarity: GOLDSTEIN, HIRD AND WHITE 93, 279.

## **Bristle formation**

shaggy repression of *achaete-scute*: SIMPSON, RUEL, HEITZLER AND BOUROUIS 93, 29.

## **cadherin**

cell adhesion and signal transduction in *Drosophila*: PEIFER, ORSULIC, PAI AND LOUREIRO 93, 163.

## **Caenorhabditis elegans**

*C. elegans* blastomere polarity: GOLDSTEIN, HIRD AND WHITE 93, 279.

*C. elegans*, vulval development: HILL AND STERNBERG 93, 9.

## **CD31**

interactions amongst cell adhesion molecules: SIMMONS 93, 193.

## **CD66**

interactions amongst cell adhesion molecules: SIMMONS 93, 193.

## **Cell adhesion**

developmental expression of the syndecans: BERNFIELD, HINKES AND GALLO 93, 205.

keratinocyte integrins: WATT AND JONES 93, 185.

O-2A progenitor cell migration: KIERNAN AND FFRENCH-CONSTANT 93, 219.

tumor suppressor genes: BRYANT, WATSON, JUSTICE AND WOODS 93, 239.

## **Cell adhesion molecules**

interactions amongst cell adhesion molecules: SIMMONS 93, 193.

## **Cell-cell adhesion**

cell adhesion and signal transduction in *Drosophila*: PEIFER, ORSULIC, PAI AND LOUREIRO 93, 163.

## **Cell-cell communication**

*Drosophila* retinal development: CAGAN 93, 19.

## **Cell-cell interaction**

integrins and morphogenesis: BROWN, BLOOR, DUNIN-BORKOWSKI AND MARTIN-BERMUDO 93, 177.

## **Cell communication**

cell adhesion and signal transduction in *Drosophila*: PEIFER, ORSULIC, PAI AND LOUREIRO 93, 163.

## **Cell cycling**

morphological mutants in fission yeast: SNELL AND NURSE 93, 289.

## **Cell division**

DER in Malpighian tubule development: BAUMANN AND SKAER 93, 65.

## **Cell fate**

*Drosophila* retinal development: CAGAN 93, 19.

torso signalling pathway: LU, PERKINS AND PERRIMON 93, 47.

## **Cell fate determination**

*E(spl)* in cell fate determination: TATA AND HARTLEY 93, 139.

## **Cell interactions**

*hedgehog* signalling in the *Drosophila* embryo: FORBES, NAKANO, TAYLOR AND INGHAM 93, 115.

## **Cell migration**

migration of *Drosophila* germ cells: HOWARD, JAGLARZ, ZHANG, SHAH AND WARRIOR 93, 213.

O-2A progenitor cell migration: KIERNAN AND FFRENCH-CONSTANT 93, 219.

## **Cell patterning**

*C. elegans*, vulval development: HILL AND STERNBERG 93, 9.

## **Cell polarity**

*C. elegans* blastomere polarity: GOLDSTEIN, HIRD AND WHITE 93, 279.

epithelial development in *Drosophila*: KNUST, TEPAB AND WODARZ 93, 261.

## **Cellular differentiation**

signalling pathways in *Dictyostelium*: WILLIAMS, HOPPER, EARLY, TRAYNOR, HARWOOD, ABE, SIMON AND VERON 93, 1.

## **Cellular polarity mutant**

cellular polarity in *Drosophila*: GUBB 93, 269.

## **crumbs**

epithelial development in *Drosophila*: KNUST, TEPAB AND WODARZ 93, 261.

## **Csk**

Ser family protein tyrosine kinases: COURTNEIDGE, FUMAGALLI, KOEGL, SUPERTI-FURGA AND TWAMLEY-STEIN 93, 57.

## **cubitus interruptus**

*hedgehog* signalling in the *Drosophila* embryo: FORBES, NAKANO, TAYLOR AND INGHAM 93, 115.

## **Delta**

shaggy repression of *achaete-scute*: SIMPSON, RUEL, HEITZLER AND BOUROUIS 93, 29.

## **DER**

DER in Malpighian tubule development: BAUMANN AND SKAER 93, 65.

## **Dictyostelium**

signalling pathways in *Dictyostelium*: WILLIAMS, HOPPER, EARLY, TRAYNOR, HARWOOD, ABE, SIMON AND VERON 93, 1.

## **DIF**

signalling pathways in *Dictyostelium*: WILLIAMS, HOPPER, EARLY, TRAYNOR, HARWOOD, ABE, SIMON AND VERON 93, 1.

## **discs large**

tumor suppressor genes: BRYANT, WATSON, JUSTICE AND WOODS 93, 239.

## **dishevelled**

*engrailed* and *wingless* in segment polarity mutants: VAN DEN HEUVEL, KLINGENSMITH, PERRIMON AND NUSSE 93, 105.

**Drosophila**

- DER in Malpighian tubule development: BAUMANN AND SKAER **93**, 65.
- epithelial development in *Drosophila*: KNUST, TEPAB AND WODARZ **93**, 261.
- cellular polarity in *Drosophila*: GUBB **93**, 269.
- migration of *Drosophila* germ cells: HOWARD, JAGLARZ, ZHANG, SHAH AND WARRIOR **93**, 213.
- Drosophila* pattern formation: RING AND MARTINEZ ARIAS **93**, 251.
- Drosophila* retinal development: CAGAN **93**, 19.
- engrailed* and *wingless* in segment polarity mutants: VAN DEN HEUVEL, KLINGENSMITH, PERRIMON AND NUSSE **93**, 105.
- E(spl)* in cell fate determination: TATA AND HARTLEY **93**, 139.
- integrins and morphogenesis: BROWN, BLOOR, DUNIN-BORKOWSKI AND MARTIN-BERMUDO **93**, 177.
- life history of the RP3 motor neuron: BROADIE, SINK, VAN VACTOR, FAMBROUGH, WHITTINGTON, BATE AND GOODMAN **93**, 227.
- myogenesis in neurogenic mutants: BATE, RUSHTON AND FRASCH **93**, 149.
- sevenless signal transduction pathway: HAFEN, DICKSON, RAABE, BRUNNER, OELLERS AND VAN DER STRATEN **93**, 41.
- shaggy* repression of *achaete-scute*: SIMPSON, RUEL, HEITZLER AND BOUROUIS **93**, 29.
- torso signalling pathway: LU, PERKINS AND PERRIMON **93**, 47.
- tumor suppressor genes: BRYANT, WATSON, JUSTICE AND WOODS **93**, 239.
- transformation of mammary cells by *wingless*: RAMAKRISHNA AND BROWN **93**, 95.
- ecmA**  
signalling pathways in *Dictyostelium*: WILLIAMS, HOPPER, EARLY, TRAYNOR, HARWOOD, ABE, SIMON AND VERON **93**, 1.
- ecmB**  
signalling pathways in *Dictyostelium*: WILLIAMS, HOPPER, EARLY, TRAYNOR, HARWOOD, ABE, SIMON AND VERON **93**, 1.
- EGF**  
*C. elegans*, vulval development: HILL AND STERNBERG **93**, 9.
- EGF-like protein**  
epithelial development in *Drosophila*: KNUST, TEPAB AND WODARZ **93**, 261.
- Egfr**  
DER in Malpighian tubule development: BAUMANN AND SKAER **93**, 65.
- Embryogenesis**  
torso signalling pathway: LU, PERKINS AND PERRIMON **93**, 47.
- Embryonic axis formation**  
*C. elegans* blastomere polarity: GOLDSTEIN, HIRD AND WHITE **93**, 279.
- Embryonic development**  
life history of the RP3 motor neuron: BROADIE, SINK, VAN VACTOR, FAMBROUGH, WHITTINGTON, BATE AND GOODMAN **93**, 227.
- engrailed**  
*engrailed* and *wingless* in segment polarity mutants: VAN DEN HEUVEL, KLINGENSMITH, PERRIMON AND NUSSE **93**, 105.
- Enhancer of split**  
*E(spl)* in cell fate determination: TATA AND HARTLEY **93**, 139.
- Enhancer trap lines**  
migration of *Drosophila* germ cells: HOWARD, JAGLARZ, ZHANG, SHAH AND WARRIOR **93**, 213.
- Epidermal differentiation**  
*E(spl)* in cell fate determination: TATA AND HARTLEY **93**, 139.

**Epidermal growth factor receptor**

- DER in Malpighian tubule development: BAUMANN AND SKAER **93**, 65.
- Epidermis**  
*Drosophila* pattern formation: RING AND MARTINEZ ARIAS **93**, 251.  
keratinocyte integrins: WATT AND JONES **93**, 185.
- Epithelium**  
epithelial development in *Drosophila*: KNUST, TEPAB AND WODARZ **93**, 261.
- Extracellular matrix**  
integrins and morphogenesis: BROWN, BLOOR, DUNIN-BORKOWSKI AND MARTIN-BERMUDO **93**, 177.  
O-2A progenitor cell migration: KIERNAN AND FFRENCH-CONSTANT **93**, 219.
- Extracellular matrix protein**  
signalling pathways in *Dictyostelium*: WILLIAMS, HOPPER, EARLY, TRAYNOR, HARWOOD, ABE, SIMON AND VERON **93**, 1.
- extramacrochaetae**  
*shaggy* repression of *achaete-scute*: SIMPSON, RUEL, HEITZLER AND BOUROUIS **93**, 29.
- fused**  
*hedgehog* signalling in the *Drosophila* embryo: FORBES, NAKANO, TAYLOR AND INGHAM **93**, 115.
- Gametogenesis**  
the *kit*-ligand (steel factor) and its receptor *c-kit-W*: BESMER, MANOVA, DUTTLINGER, HUANG, PACKER, GYSSLER AND BACHVAROVA **93**, 125.
- Gap junction permeability**  
responses to *Wnt* signals: MOON, CHRISTIAN, CAMPBELL, MCGREW, DEMARIS, TORRES, LAI, OLSON AND KELLY **93**, 85.
- Gene regulation**  
*shaggy* repression of *achaete-scute*: SIMPSON, RUEL, HEITZLER AND BOUROUIS **93**, 29.
- Germ cell**  
migration of *Drosophila* germ cells: HOWARD, JAGLARZ, ZHANG, SHAH AND WARRIOR **93**, 213.
- Germ line determination**  
*C. elegans* blastomere polarity: GOLDSTEIN, HIRD AND WHITE **93**, 279.
- groucho**  
*E(spl)* in cell fate determination: TATA AND HARTLEY **93**, 139.
- hedgehog**  
*hedgehog* signalling in the *Drosophila* embryo: FORBES, NAKANO, TAYLOR AND INGHAM **93**, 115.
- Helix-loop-helix protein**  
*E(spl)* in cell fate determination: TATA AND HARTLEY **93**, 139.
- Heparan sulphate**  
developmental expression of the syndecans: BERNFIELD, HINKES AND GALLO **93**, 205.
- huckebein**  
torso signalling pathway: LU, PERKINS AND PERRIMON **93**, 47.
- Human**  
interactions amongst cell adhesion molecules: SIMMONS **93**, 193.  
keratinocyte integrins: WATT AND JONES **93**, 185.
- ICAMs**  
interactions amongst cell adhesion molecules: SIMMONS **93**, 193.
- Imaginal disc**  
cellular polarity in *Drosophila*: GUBB **93**, 269.  
tumor suppressor genes: BRYANT, WATSON, JUSTICE AND WOODS **93**, 239.
- Induction**  
responses to *Wnt* signals: MOON, CHRISTIAN, CAMPBELL, MCGREW, DEMARIS, TORRES, LAI, OLSON AND KELLY **93**, 85.
- Integrin**  
integrins and morphogenesis: BROWN, BLOOR, DUNIN-BORKOWSKI AND MARTIN-BERMUDO **93**, 177.

- keratinocyte integrins: WATT AND JONES **93**, 185.
- Intercellular signalling**  
*C. elegans*, vulval development: HILL AND STERNBERG **93**, 9.  
 DER in Malpighian tubule development: BAUMANN AND SKAER **93**, 65.
- Keratinocyte**  
 keratinocyte integrins: WATT AND JONES **93**, 185.
- c-kit ligand**  
 the *kit*-ligand (steel factor) and its receptor *c-kit-W*: BESMER, MANOVA, DUTTLINGER, HUANG, PACKER, GYSSLER AND BACHVAROVA **93**, 125.
- c-kit receptor**  
 the *kit*-ligand (steel factor) and its receptor *c-kit-W*: BESMER, MANOVA, DUTTLINGER, HUANG, PACKER, GYSSLER AND BACHVAROVA **93**, 125.
- Lamina cribrosa**  
 O-2A progenitor cell migration: KIERNAN AND FFRENCH-CONSTANT **93**, 219.
- Laminin A G domain-like repeat**  
 epithelial development in *Drosophila*: KNUST, TEPAB AND WODARZ **93**, 261.
- LFA-1**  
 interactions amongst cell adhesion molecules: SIMMONS **93**, 193.
- lin-3**  
*C. elegans*, vulval development: HILL AND STERNBERG **93**, 9.
- Male gametophyte development**  
 cellular interactions in *Arabidopsis*: PRUITT, HULSKAMP, KOPCZAK, PLOENSE AND SCHNEITZ **93**, 77.
- Malpighian tubule**  
 DER in Malpighian tubule development: BAUMANN AND SKAER **93**, 65.
- Melanogenesis**  
 the *kit*-ligand (steel factor) and its receptor *c-kit-W*: BESMER, MANOVA, DUTTLINGER, HUANG, PACKER, GYSSLER AND BACHVAROVA **93**, 125.
- Mesoderm**  
 responses to *Wnt* signals: MOON, CHRISTIAN, CAMPBELL, MCGREW, DEMARAIS, TORRES, LAI, OLSON AND KELLY **93**, 85.
- Microfilament**  
*C. elegans* blastomere polarity: GOLDSTEIN, HIRD AND WHITE **93**, 279.
- Mirror symmetry**  
 cellular polarity in *Drosophila*: GUBB **93**, 269.
- Motor neuron**  
 life history of the RP3 motor neuron: BROADIE, SINK, VAN VACTOR, FAMBROUGH, WHITINGTON, BATE AND GOODMAN **93**, 227.
- Mouse**  
 developmental expression of the syndecans: BERNFIELD, HINKES AND GALLO **93**, 205.  
 the *kit*-ligand (steel factor) and its receptor *c-kit-W*: BESMER, MANOVA, DUTTLINGER, HUANG, PACKER, GYSSLER AND BACHVAROVA **93**, 125.  
 transformation of mammary cells by *wingless*: RAMAKRISHNA AND BROWN **93**, 95.
- Myogenesis**  
 myogenesis in neurogenic mutants: BATE, RUSHTON AND FRASCH **93**, 149.
- Neuroepithelium**  
*Drosophila* retinal development: CAGAN **93**, 19.
- Neurogenesis**  
 life history of the RP3 motor neuron: BROADIE, SINK, VAN VACTOR, FAMBROUGH, WHITINGTON, BATE AND GOODMAN **93**, 227.
- Neurogenic gene**  
 myogenesis in neurogenic mutants: BATE, RUSHTON AND FRASCH **93**, 149.
- Noggin**  
 responses to *Wnt* signals: MOON, CHRISTIAN, CAMPBELL, MCGREW, DEMARAIS, TORRES, LAI, OLSON AND KELLY **93**, 85.
- Notch**  
 myogenesis in neurogenic mutants: BATE, RUSHTON AND FRASCH **93**, 149.  
*shaggy* repression of *achaete-scute*: SIMPSON, RUEL, HEITZLER AND BOUROUIS **93**, 29.
- O-2A progenitor cell**  
 O-2A progenitor cell migration: KIERNAN AND FFRENCH-CONSTANT **93**, 219.
- Oligodendrocyte**  
 O-2A progenitor cell migration: KIERNAN AND FFRENCH-CONSTANT **93**, 219.
- Ommatidium**  
 cellular polarity in *Drosophila*: GUBB **93**, 269.  
*Drosophila* retinal development: CAGAN **93**, 19.
- patched**  
*hedgehog* signalling in the *Drosophila* embryo: FORBES, NAKANO, TAYLOR AND INGHAM **93**, 115.
- Pattern formation**  
 cell adhesion and signal transduction in *Drosophila*: PEIFER, ORSULIC, PAI AND LOUREIRO **93**, 163.  
 torso signalling pathway: LU, PERKINS AND PERRIMON **93**, 47.
- PDGF receptor**  
 Scr family protein tyrosine kinases: COURTNEIDGE, FUMAGALLI, KOEGL, SUPERTI-FURGA AND TWAMLEY-STEIN **93**, 57.
- Photoreceptor cell fate**  
 sevenless signal transduction pathway: HAFEN, DICKSON, RAABE, BRUNNER, OELLERS AND VAN DER STRATEN **93**, 41.
- PKA**  
 signalling pathways in *Dictyostelium*: WILLIAMS, HOPPER, EARLY, TRAYNOR, HARWOOD, ABE, SIMON AND VERON **93**, 1.
- Plant reproduction**  
 cellular interactions in *Arabidopsis*: PRUITT, HULSKAMP, KOPCZAK, PLOENSE AND SCHNEITZ **93**, 77.
- Polarity**  
 morphological mutants in fission yeast: SNELL AND NURSE **93**, 289.
- Pollen tube growth**  
 cellular interactions in *Arabidopsis*: PRUITT, HULSKAMP, KOPCZAK, PLOENSE AND SCHNEITZ **93**, 77.
- porcupine**  
*engrailed* and *wingless* in segment polarity mutants: VAN DEN HEUVEL, KLINGENSMITH, PERRIMON AND NUSSE **93**, 105.
- Position-specific differentiation**  
*Drosophila* pattern formation: RING AND MARTINEZ ARIAS **93**, 251.
- Protein kinase**  
*shaggy* repression of *achaete-scute*: SIMPSON, RUEL, HEITZLER AND BOUROUIS **93**, 29.
- Protein targeting**  
 epithelial development in *Drosophila*: KNUST, TEPAB AND WODARZ **93**, 261.
- Protein tyrosine kinase**  
 Scr family protein tyrosine kinases: COURTNEIDGE, FUMAGALLI, KOEGL, SUPERTI-FURGA AND TWAMLEY-STEIN **93**, 57.
- Proteoglycans**  
 developmental expression of the syndecans: BERNFIELD, HINKES AND GALLO **93**, 205.
- Proto-oncogene**  
 transformation of mammary cells by *wingless*: RAMAKRISHNA AND BROWN **93**, 95.
- PS integrin**  
 integrins and morphogenesis: BROWN, BLOOR, DUNIN-BORKOWSKI AND MARTIN-BERMUDO **93**, 177.

- puckered**  
*Drosophila* pattern formation: RING AND MARTINEZ ARIAS 93, 251.
- ras-1**  
 morphological mutants in fission yeast: SNELL AND NURSE 93, 289.
- Receptor tyrosine kinase**  
 cellular interactions in *Arabidopsis*: PRUITT, HULSKAMP, KOPCZAK, PLOENSE AND SCHNEITZ 93, 77.  
 sevenless signal transduction pathway: HAFEN, DICKSON, RAABE, BRUNNER, OELLERS AND VAN DER STRATEN 93, 41.
- Retina**  
*Drosophila* retinal development: CAGAN 93, 19.
- S59**  
 myogenesis in neurogenic mutants: BATE, RUSHTON AND FRASCH 93, 149.
- Schizosaccharomyces pombe**  
 morphological mutants in fission yeast: SNELL AND NURSE 93, 289.  
 Scr family protein tyrosine kinases: COURTNEIDGE, FUMAGALLI, KOEGL, SUPERTI-FURGA AND TWAMLEY-STEIN 93, 57.
- Scr**  
 Scr family protein tyrosine kinases: COURTNEIDGE, FUMAGALLI, KOEGL, SUPERTI-FURGA AND TWAMLEY-STEIN 93, 57.
- scute**  
 shaggy repression of *achaete-scute*: SIMPSON, RUEL, HEITZLER AND BOUROUIS 93, 29.
- Segment polarity**  
 transformation of mammary cells by *wingless*: RAMAKRISHNA AND BROWN 93, 95.
- Segment polarity gene**  
*hedgehog* signalling in the *Drosophila* embryo: FORBES, NAKANO, TAYLOR AND INGHAM 93, 115.
- Segmentation**  
*engrailed* and *wingless* in segment polarity mutants: VAN DEN HEUVEL, KLINGENSMITH, PERRIMON AND NUSSE 93, 105.
- Septation**  
 morphological mutants in fission yeast: SNELL AND NURSE 93, 289.
- sevenless receptor tyrosine kinase**  
 sevenless signal transduction pathway: HAFEN, DICKSON, RAABE, BRUNNER, OELLERS AND VAN DER STRATEN 93, 41.
- shaggy**  
 shaggy repression of *achaete-scute*: SIMPSON, RUEL, HEITZLER AND BOUROUIS 93, 29.
- Signal transduction**  
 shaggy repression of *achaete-scute*: SIMPSON, RUEL, HEITZLER AND BOUROUIS 93, 29.  
 torso signalling pathway: LU, PERKINS AND PERRIMON 93, 47.  
 tumor suppressor genes: BRYANT, WATSON, JUSTICE AND WOODS 93, 239.  
 responses to *Wnt* signals: MOON, CHRISTIAN, CAMPBELL, MCGREW, DEMARAIS, TORRES, LAI, OLSON AND KELLY 93, 85.
- S locus**  
 cellular interactions in *Arabidopsis*: PRUITT, HULSKAMP, KOPCZAK, PLOENSE AND SCHNEITZ 93, 77.
- Slug formation**  
 signalling pathways in *Dictyostelium*: WILLIAMS, HOPPER, EARLY, TRAYNOR, HARWOOD, ABE, SIMON AND VERON 93, 1.
- Stalk cell differentiation**  
 signalling pathways in *Dictyostelium*: WILLIAMS, HOPPER, EARLY, TRAYNOR, HARWOOD, ABE, SIMON AND VERON 93, 1.
- stardust**  
 epithelial development in *Drosophila*: KNUST, TEPAB AND WODARZ 93, 261.
- steel mutation**  
 the *kit*-ligand (steel factor) and its receptor *c-kit-W*: BESMER, MANOVA, DUTTLINGER, HUANG, PACKER, GYSSLER AND BACHVAROVA 93, 125.
- Synaptogenesis**  
 life history of the RP3 motor neuron: BROADIE, SINK, VAN VACTOR, FAMBROUGH, WHITINGTON, BATE AND GOODMAN 93, 227.
- Syndecan**  
 developmental expression of the syndecans: BERNFIELD, HINKES AND GALLO 93, 205.
- tailless**  
 torso signalling pathway: LU, PERKINS AND PERRIMON 93, 47.
- Tenascin**  
 O-2A progenitor cell migration: KIERNAN AND FFRENCH-CONSTANT 93, 219.
- Tyrosine kinase**  
 torso signalling pathway: LU, PERKINS AND PERRIMON 93, 47.
- vestigial**  
 myogenesis in neurogenic mutants: BATE, RUSHTON AND FRASCH 93, 149.
- Vulval development**  
*C. elegans*, vulval development: HILL AND STERNBERG 93, 9.
- WD40 type protein**  
*E(spl)* in cell fate determination: TATA AND HARTLEY 93, 139.
- white spotting mutation**  
 the *kit*-ligand (steel factor) and its receptor *c-kit-W*: BESMER, MANOVA, DUTTLINGER, HUANG, PACKER, GYSSLER AND BACHVAROVA 93, 125.
- Wing development**  
 cellular polarity in *Drosophila*: GUBB 93, 269.
- wingless**  
 cell adhesion and signal transduction in *Drosophila*: PEIFER, ORSULIC, PAI AND LOUREIRO 93, 163.  
*engrailed* and *wingless* in segment polarity mutants: VAN DEN HEUVEL, KLINGENSMITH, PERRIMON AND NUSSE 93, 105.  
*hedgehog* signalling in the *Drosophila* embryo: FORBES, NAKANO, TAYLOR AND INGHAM 93, 115.  
 transformation of mammary cells by *wingless*: RAMAKRISHNA AND BROWN 93, 95.
- Wnts**  
 responses to *Wnt* signals: MOON, CHRISTIAN, CAMPBELL, MCGREW, DEMARAIS, TORRES, LAI, OLSON AND KELLY 93, 85.
- Wnt-1**  
 transformation of mammary cells by *wingless*: RAMAKRISHNA AND BROWN 93, 95.
- Xenopus**  
 responses to *Wnt* signals: MOON, CHRISTIAN, CAMPBELL, MCGREW, DEMARAIS, TORRES, LAI, OLSON AND KELLY 93, 85.
- Xwnf-8**  
 responses to *Wnt* signals: MOON, CHRISTIAN, CAMPBELL, MCGREW, DEMARAIS, TORRES, LAI, OLSON AND KELLY 93, 85.
